# Supplementary material for: ANGPTL3 Variants Associate with Lower Levels of Irisin and C-Peptide in a Cohort of Arab Individuals
Source: MDPI journal article supplement (doi:10.3390/genes12050755), 2021-05-17
Supplement: s1 [file s1]

**Table S1.** SNP quality assessment tests for Hardy-Weinberg equilibrium (HWE).

| SNP        | Gene<br>(functional<br>consequence)     | Minor/Major<br>alleles | MAF   | Genotype<br>counts | Observed<br>heterozygous | Expected<br>heterozygous | P-value<br>HWE |
|------------|-----------------------------------------|------------------------|-------|--------------------|--------------------------|--------------------------|----------------|
| rs1748197  | <i>DOCK7</i><br>(intronic)              | A/G                    | 0.355 | 40/119/121         | 0.425                    | 0.458                    | 0.241          |
| rs12130333 | <i>DOCK7-<br/>ATG4C</i><br>(intergenic) | T/C                    | 0.146 | 10/62/209          | 0.220                    | 0.249                    | 0.057          |

**Table S2.** Clinical characteristics of the study cohort as per gender-wise distribution<sup>®</sup>.

| Traits                   | Male participants<br>(Mean±SD) | Female participants<br>(Mean±SD) | P-value <sup>s</sup> (for differences in<br>mean values between male<br>and female participants) |
|--------------------------|--------------------------------|----------------------------------|--------------------------------------------------------------------------------------------------|
| Age (in years)           | 46.62±12.44                    | 45.95±12.37                      | 0.654                                                                                            |
| Height (in meter)        | 1.72±0.065                     | 1.59±0.06                        | <2.2 × 10 <sup>-16</sup>                                                                         |
| Weight (in kg)           | 89.07±14.62                    | 75.33±14.86                      | 3.48 × 10 <sup>-13</sup>                                                                         |
| BMI (kg/m <sup>2</sup> ) | 30.12±4.71                     | 29.77±5.53                       | 0.569                                                                                            |
| WC (in cm)               | 104.76±11.43                   | 95.30±13.31                      | 1.01 × 10 <sup>-6</sup>                                                                          |
| HDL (in mmol/l)          | 1.05±0.249                     | 1.32±0.32                        | 6.75 × 10 <sup>-13</sup>                                                                         |
| TC (in mmol/l)           | 5.25±1.19                      | 5.52±1.24                        | 0.0701                                                                                           |
| LDL (in mmol/l)          | 3.48±1.22                      | 3.53±1.11                        | 0.728                                                                                            |
| Non-HDL (inmmol/l)       | 4.19±1.21                      | 4.13±1.16                        | 0.654                                                                                            |
| TG (in mmol/l)           | 1.39±0.635                     | 1.08±0.52                        | 3.73 × 10 <sup>-5</sup>                                                                          |
| FPG (in mmol/l)          | 6.11±1.41                      | 5.51±1.00                        | 2.9 × 10 <sup>-4</sup>                                                                           |
| HbA1c (%)                | 6.54±1.34                      | 6.12±1.22                        | 0.012                                                                                            |
| Irisin (ng/ml)           | 564.39±179                     | 550.92±202                       | 0.602                                                                                            |
| IL7 (pg/ml) <sup>®</sup> | 13.93±6.03                     | 12.67±5.48                       | 0.171                                                                                            |
| IL13 (pg/ml)             | 10.46±4.48                     | 9.06±5.03                        | 0.067                                                                                            |
| Insulin (pg/ml)          | 15.85±11.87                    | 14.14±12.04                      | 0.320                                                                                            |
| c-peptide (pg/ml)        | 2.49±1.52                      | 2.79±1.86                        | 0.262                                                                                            |
| ANGPTL3 (ng/ml)          | 36.65±9.51                     | 37.98±10.82                      | 0.364                                                                                            |

|                           |                                  |                                |       |
|---------------------------|----------------------------------|--------------------------------|-------|
| TNFα (pg/ml)              | 125.48±32.25                     | 129.45±32.14                   | 0.429 |
| Obese status              | 63 (obese):62 (non obese)        | 72 (obese):81 (non obese)      | 0.664 |
| Diabetes status           | 60 (diabetic): 65 (non-diabetic) | 60 (diabetic):93(non-diabetic) | 0.177 |
| Anti-diabetic medication  | 49 (med):76 (no med)             | 52 (no med):100                | 0.463 |
| Lipid lowering medication | 44(med):81                       | 44(med):108                    | 0.325 |

<sup>¶</sup>, The values for TC, and LDL were adjusted for lipid lowering medication by adopting procedures used in [Liu, D., Peloso, G., Yu, H. et al. Exome-wide association study of plasma lipids in >300,000 individuals. Nat Genet **49**, 1758–1766 (2017). <https://doi.org/10.1038/ng.3977>]: TC<sub>adjusted</sub>=TC/0.8; and LDL<sub>adjusted</sub>=LDL/0.7. The nonHDL was calculated by subtracting HDL from adjusted TC.

**Table S3.** Differences in the levels of c-peptide and irisin between individuals with reference homozygous genotypes and those with carrier genotypes at each of the two study variants.

| Trait     | SNP        | (Mean±SD) in individuals with reference homozygous genotypes<br>(rs1748197:GG;<br>rs12130333:CC) | (Mean±SD) in individuals with carrier genotypes<br>(rs1748197:GA+AA;<br>rs12130333:CT+TT) | P-value <sup>§</sup> (for differences in mean values between individuals having reference genotypes and carrier genotypes. |
|-----------|------------|--------------------------------------------------------------------------------------------------|-------------------------------------------------------------------------------------------|----------------------------------------------------------------------------------------------------------------------------|
| c-peptide | rs1748197  | 3.155±1.819                                                                                      | 2.25±1.55                                                                                 | 0.0015                                                                                                                     |
|           | rs12130333 | 2.91±1.79                                                                                        | 1.94±1.27                                                                                 | 0.0003                                                                                                                     |
| Irisin    | rs1748197  | 599.45±192.83                                                                                    | 524.9±186.7                                                                               | 0.027                                                                                                                      |
|           | rs12130333 | 573.29±191.33                                                                                    | 509.37±188.64                                                                             | 0.085                                                                                                                      |

<sup>§</sup>, Student's t-test was used for quantitative variables.

**Table S4.** Results of association tests for the two study variants with phenotype traits, using genetic model based on additive mode of inheritance. Association tests were adjusted for age, sex (Regular correction) and further confounders of diabetes medication (DM) and lipid lowering medication (LLM). Significant *P*-values passing the threshold for multiple testing (*P*-value  $\leq 0.003 = 0.05/17$ ) and significant *P<sub>emp</sub>*-value  $\leq 0.05$  are high-lighted in bold & italics font. Associations with *P*-values  $\leq 0.05$  are highlighted in bold font.

| Traits    | SNP with effect allele | Correction | Sample size | $\beta$  | <i>P</i> -value&       | Empirical <i>P</i> -value ( <i>P<sub>emp</sub></i> -value)& |
|-----------|------------------------|------------|-------------|----------|------------------------|-------------------------------------------------------------|
| c-peptide | rs1748197              | R          | 160         | -0.6976  | <b><i>0.000127</i></b> | <b><i>0.00679</i></b>                                       |
|           |                        | DM         | 160         | -0.6944  | <b><i>0.000161</i></b> | <b><i>0.00939</i></b>                                       |
|           |                        | LLM        | 160         | -0.6964  | <b><i>0.000138</i></b> | <b><i>0.00739</i></b>                                       |
|           | rs12130333             | R          | 161         | -0.9002  | <b><i>0.00032</i></b>  | <b><i>0.0154</i></b>                                        |
|           |                        | R+DM       | 161         | -0.8991  | <b><i>0.000335</i></b> | <b><i>0.0174</i></b>                                        |
|           |                        | R+LLM      | 161         | -0.9117  | <b><i>0.000288</i></b> | <b><i>0.0167</i></b>                                        |
|           |                        |            |             |          |                        |                                                             |
| Irisin    | rs1748197              | R          | 217         | -63.1    | <b><i>0.000299</i></b> | <b><i>0.0149</i></b>                                        |
|           |                        | DM         | 216         | -67.78   | <b><i>9.58E-05</i></b> | <b><i>0.0047</i></b>                                        |
|           |                        | LLM        | 216         | -63      | <b><i>0.000357</i></b> | <b><i>0.0184</i></b>                                        |
|           | rs12130333             | R          | 218         | -72.61   | <b><i>0.002135</i></b> | 0.0979                                                      |
|           |                        | R+DM       | 217         | -70.87   | <b><i>0.002436</i></b> | 0.1184                                                      |
|           |                        | R+LLM      | 217         | -74.3    | <b><i>0.001806</i></b> | 0.0898                                                      |
|           |                        |            |             |          |                        |                                                             |
| TG        | rs1748197              | R          | 257         | -0.07759 | 0.1235                 | 0.9989                                                      |
|           |                        | DM         | 256         | -0.1008  | <b><i>0.04564</i></b>  | 0.8984                                                      |
|           |                        | LLM        | 256         | -0.08852 | 0.08188                | 0.9853                                                      |
|           | rs12130333             | R          | 258         | -0.1369  | <b><i>0.03926</i></b>  | 0.8709                                                      |
|           |                        | R+DM       | 257         | -0.132   | <b><i>0.04434</i></b>  | 0.8917                                                      |
|           |                        | R+LLM      | 257         | -0.1334  | <b><i>0.04469</i></b>  | 0.8991                                                      |
|           |                        |            |             |          |                        |                                                             |
| FPG       | rs1748197              | R          | 239         | -0.05879 | 0.5645                 | 1                                                           |
|           |                        | DM         | 238         | -0.1421  | 0.1395                 | 0.9995                                                      |

|        |            |       |     |          |         |        |
|--------|------------|-------|-----|----------|---------|--------|
|        |            | LLM   | 238 | -0.07696 | 0.4457  | 1      |
|        | rs12130333 | R     | 239 | -0.06309 | 0.6295  | 1      |
|        |            | R+DM  | 238 | -0.09334 | 0.4424  | 1      |
|        |            | R+LLM | 238 | -0.07927 | 0.5372  | 1      |
|        |            |       |     |          |         |        |
| HbA1c  | rs1748197  | R     | 251 | 0.1714   | 0.1094  | 0.9958 |
|        |            | DM    | 250 | 0.03895  | 0.6681  | 1      |
|        |            | LLM   | 250 | 0.1411   | 0.1676  | 0.9997 |
|        | rs12130333 | R     | 252 | -0.09417 | 0.5011  | 1      |
|        |            | R+DM  | 251 | -0.1285  | 0.2672  | 1      |
|        |            | R+LLM | 251 | -0.09992 | 0.4505  | 1      |
|        |            |       |     |          |         |        |
| HDL    | rs1748197  | R     | 257 | 0.003359 | 0.8989  | 1      |
|        |            | DM    | 256 | 0.01511  | 0.5664  | 1      |
|        |            | LLM   | 256 | 0.01106  | 0.6766  | 1      |
|        | rs12130333 | R     | 258 | 0.0582   | 0.09481 | 0.9926 |
|        |            | R+DM  | 257 | 0.05328  | 0.1207  | 0.9986 |
|        |            | R+LLM | 257 | 0.05558  | 0.1088  | 0.9969 |
|        |            |       |     |          |         |        |
| nonHDL | rs1748197  | R     | 256 | -0.2321  | 0.0257  | 0.7363 |
|        |            | DM    | 256 | -0.2417  | 0.0208  | 0.6565 |
|        |            | LLM   | 256 | -0.2577  | 0.0113  | 0.4375 |
|        | rs12130333 | R     | 257 | -0.1641  | 0.2344  | 1      |
|        |            | R+DM  | 257 | -0.1603  | 0.2461  | 1      |
|        |            | R+LLM | 257 | -0.1555  | 0.2486  | 1      |
|        |            |       |     |          |         |        |
| LDL®   | rs1748197  | R     | 266 | -0.1032  | 0.3132  | 1      |
|        |            | DM    | 265 | -0.116   | 0.2594  | 1      |

|                     |            |       |     |          |         |        |
|---------------------|------------|-------|-----|----------|---------|--------|
|                     |            | LLM   | 265 | -0.129   | 0.1944  | 1      |
|                     | rs12130333 | R     | 267 | 7.08E-05 | 0.999   | 1      |
|                     |            | R+DM  | 266 | 0.00088  | 0.994   | 1      |
|                     |            | R+LLM | 266 | 0.0087   | 0.946   | 1      |
|                     |            |       |     |          |         |        |
| TC <sup>®</sup>     | rs1748197  | R     | 270 | -0.1397  | 0.1831  | 0.999  |
|                     |            | DM    | 269 | -0.146   | 0.1666  | 0.999  |
|                     |            | LLM   | 269 | -0.163   | 0.1134  | 0.999  |
|                     | rs12130333 | R     | 271 | 0.0145   | 0.9157  | 1      |
|                     |            | R+DM  | 270 | 0.0156   | 0.9097  | 1      |
|                     |            | R+LLM | 270 | 0.0186   | 0.8901  | 1      |
|                     |            |       |     |          |         |        |
| Weight              | rs1748197  | R     | 271 | -0.847   | 0.5094  | 1      |
|                     |            | DM    | 270 | -1.423   | 0.2598  | 1      |
|                     |            | LLM   | 270 | -1.269   | 0.3155  | 1      |
|                     | rs12130333 | R     | 272 | -2.25    | 0.182   | 1      |
|                     |            | R+DM  | 271 | -2.135   | 0.1928  | 1      |
|                     |            | R+LLM | 271 | -2.142   | 0.1932  | 1      |
|                     |            |       |     |          |         |        |
| BMI                 | rs1748197  | R     | 275 | -0.5333  | 0.2292  | 1      |
|                     |            | DM    | 274 | -0.771   | 0.07754 | 0.9833 |
|                     |            | LLM   | 274 | -0.7136  | 0.102   | 0.9963 |
|                     | rs12130333 | R     | 276 | -0.9555  | 0.09993 | 0.9943 |
|                     |            | R+DM  | 275 | -0.9042  | 0.1099  | 0.9974 |
|                     |            | R+LLM | 275 | -0.9168  | 0.1063  | 0.9974 |
|                     |            |       |     |          |         |        |
| Waist circumference | rs1748197  | R     | 177 | -0.9137  | 0.4845  | 1      |

|  |            |       |     |        |        |        |
|--|------------|-------|-----|--------|--------|--------|
|  |            | DM    | 177 | -1.681 | 0.1732 | 0.9998 |
|  |            | LLM   | 177 | -1.383 | 0.2642 | 1      |
|  | rs12130333 | R     | 177 | -2.191 | 0.2181 | 1      |
|  |            | R+DM  | 177 | -2.335 | 0.1619 | 0.9996 |
|  |            | R+LLM | 177 | -2.637 | 0.1173 | 0.9986 |
|  |            |       |     |        |        |        |
|  |            |       |     |        |        |        |

<sup>@</sup>, The values for TC, and LDL were adjusted for lipid lowering medication by adopting procedures used in [Liu, D., Peloso, G., Yu, H. *et al.* Exome-wide association study of plasma lipids in >300,000 individuals. *Nat Genet* **49**, 1758–1766 (2017). <https://doi.org/10.1038/ng.3977>]: TC<sub>adjusted</sub>=TC/0.8; and LDL<sub>adjusted</sub>=LDL/0.7. The nonHDL was calculated by subtracting HDL from adjusted TC. <sup>&</sup>, Significant values are indicated by bold and italics font.

**Table S5.** Evaluation of the association signals relating to c-peptide and irisin in the sub-cohorts of entirely diabetic individuals and of entirely non-diabetic individuals.

| Traits                                    | SNP        | Correction | $\beta$ | P-value | Empirical P-value ( $P_{emp}$ -value) |
|-------------------------------------------|------------|------------|---------|---------|---------------------------------------|
| <b>Sub-cohort of diabetes individuals</b> |            |            |         |         |                                       |
| c-peptide                                 | rs1748197  | R          | -0.809  | 0.0012  | 0.0732                                |
|                                           | rs12130333 | R          | -0.709  | 0.039   | 0.863                                 |
| irisin                                    | rs1748197  | R          | -103.9  | 0.00011 | 0.0054                                |
|                                           | rs12130333 | R          | -115.3  | 0.0022  | 0.106                                 |
| <b>Sub-cohort of diabetes individuals</b> |            |            |         |         |                                       |
| c-peptide                                 | rs1748197  | R          | -0.517  | 0.0614  | 0.955                                 |
|                                           | rs12130333 | R          | -1.169  | 0.0019  | 0.104                                 |
| irisin                                    | rs1748197  | R          | -28.08  | 0.194   | 1                                     |
|                                           | rs12130333 | R          | -34.12  | 0.231   | 1                                     |

**Table S6.** Logistic regression analysis for impact of the two study variants on the disease status of the study participants.

| Disease status | SNP        | OR [CI]            | Standard error | P-value |
|----------------|------------|--------------------|----------------|---------|
| Obesity        | rs1748197  | 0.794 [0.56-1.12]  | 0.176          | 0.191   |
|                | rs12130333 | 0.765 [0.48-1.21]  | 0.234          | 0.253   |
| Diabetes       | rs1748197  | 1.23 [0.84-1.78]   | 0.189          | 0.274   |
|                | rs12130333 | 1.01 [0.62-1.64]   | 0.248          | 0.967   |
| Hypertension   | rs1748197  | 1.004 [0.66-1.52]  | 0.211          | 0.983   |
|                | rs12130333 | 0.621 [0.348-1.11] | 0.295          | 0.106   |

**Table S7.** Power Calculation for the association of the rs1748197\_A variant (MAF=0.35) and rs12130333\_T variant (MAF=0.15) with c-peptide and Irisin. Calculations for “gene only” hypothesis were performed using additive genetic model (AA versus AG versus GG for rs1748197; TT versus TC versus CC for rs12130333); calculations for “gene-environment GxE” hypothesis were performed using dominant genetic model (AA versus (AG+GG) for rs1748197; TT versus TC+CC for rs12130333).

| Frequency | Marginal Rsq | Sample Size | Expected (±) effect size considering “Gene only” hypothesis (response variable) for c-peptide | Expected (±) effect size considering “Gene only” hypothesis (response variable) for Irisin | Expected (±) effect size considering GXE hypothesis (Irisin and E=TG) |
|-----------|--------------|-------------|-----------------------------------------------------------------------------------------------|--------------------------------------------------------------------------------------------|-----------------------------------------------------------------------|
| 0.15      | 0.001        | 7845        | 0.1083                                                                                        | 12.039                                                                                     | 20.40                                                                 |
|           | 0.006        | 1304        | 0.2652                                                                                        | 29.491                                                                                     | 49.96                                                                 |
|           | 0.011        | 710         | 0.3591                                                                                        | 39.931                                                                                     | 67.65                                                                 |
|           | 0.016        | 487         | 0.4331                                                                                        | 48.159                                                                                     | 81.60                                                                 |
|           | 0.021        | 370         | 0.4962                                                                                        | 55.173                                                                                     | 93.48                                                                 |
|           | 0.026        | 298         | 0.5521                                                                                        | 61.391                                                                                     | 104.02                                                                |
|           | 0.031        | 249         | 0.6028                                                                                        | 67.034                                                                                     | 113.58                                                                |
|           | 0.036        | 214         | 0.6496                                                                                        | 72.238                                                                                     | 122.40                                                                |
|           | 0.041        | 187         | 0.6933                                                                                        | 77.092                                                                                     | 130.62                                                                |
|           | 0.046        | 167         | 0.7344                                                                                        | 81.657                                                                                     | 138.35                                                                |
|           |              |             |                                                                                               |                                                                                            |                                                                       |
| 0.35      | 0.001        | 7845        | 0.0811                                                                                        | 9.013                                                                                      | 15.27                                                                 |

|  |       |      |        |        |        |
|--|-------|------|--------|--------|--------|
|  | 0.006 | 1304 | 0.1985 | 22.078 | 37.41  |
|  | 0.011 | 710  | 0.2688 | 29.893 | 50.65  |
|  | 0.016 | 487  | 0.3242 | 36.053 | 61.08  |
|  | 0.021 | 370  | 0.3714 | 41.304 | 69.98  |
|  | 0.026 | 298  | 0.4133 | 45.958 | 77.87  |
|  | 0.031 | 249  | 0.4513 | 50.183 | 85.03  |
|  | 0.036 | 214  | 0.4863 | 54.079 | 91.63  |
|  | 0.041 | 187  | 0.5190 | 57.713 | 97.78  |
|  | 0.046 | 167  | 0.5498 | 61.131 | 103.57 |
